# Supplementary figures and images for: Structural and mechanistic insights into ribosomal ITS2 RNA processing by nuclease-kinase machinery
Source: eLife journal article supplement (doi:10.7554/elife.86847), 2023-05-02

**Figure 1B**

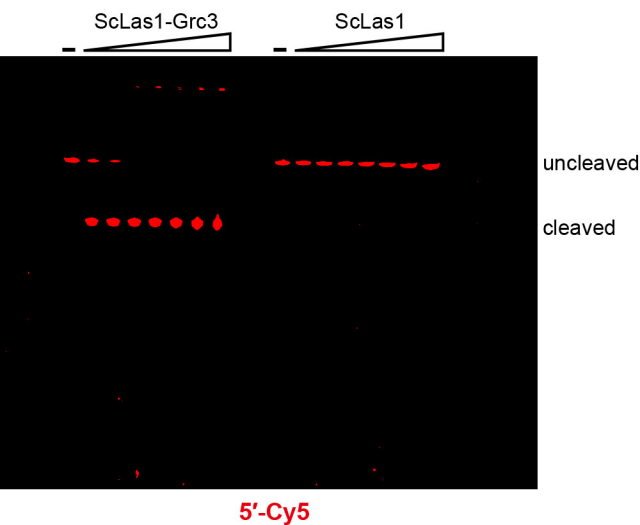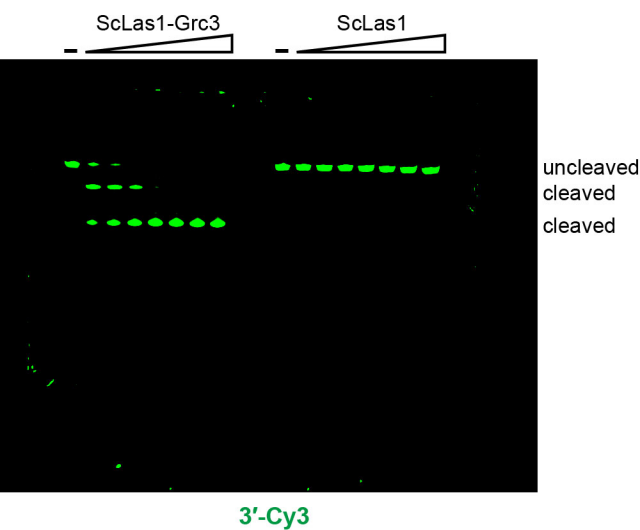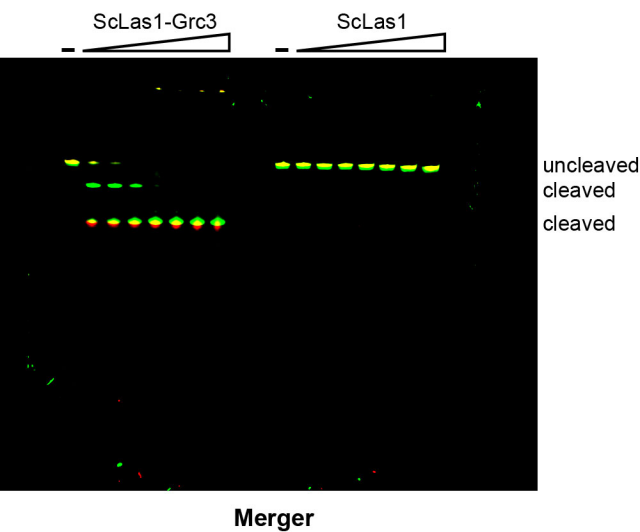

Supplement: fig1-data2 [file elife-86847-fig1-data2-v1.zip]

**Figure 1C**

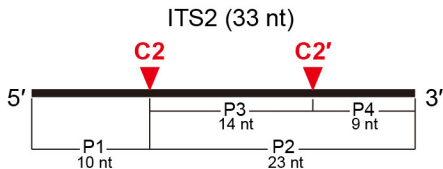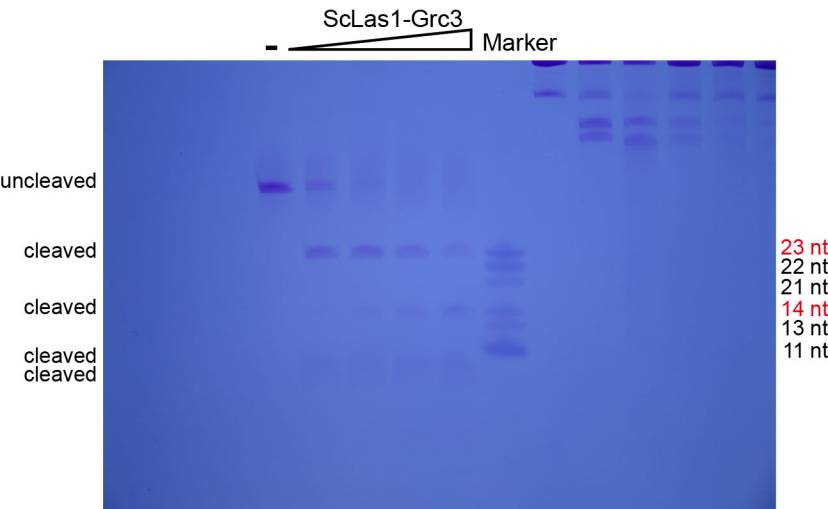

Supplement: fig1-data4 [file elife-86847-fig1-data4-v1.zip]

**Figure 1E**

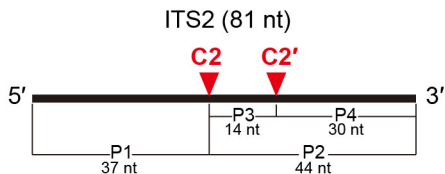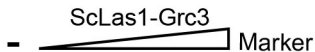

uncleaved

cleaved

cleaved

cleaved

cleaved

44 nt (P2)

37 nt (P1)

36 nt

30 nt (P4)

28 nt

14 nt (P3)

13 nt

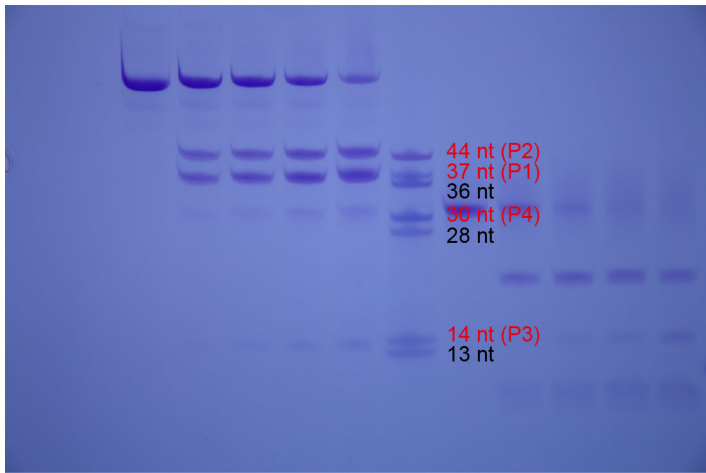

Supplement: fig1-data5 [file elife-86847-fig1-data5-v1.zip]

**Figure 1G**

|             |   |   |   |
|-------------|---|---|---|
| ITS2        | + | + | + |
| ScLas1-Grc3 | - | + | + |
| ATP         | - | - | + |

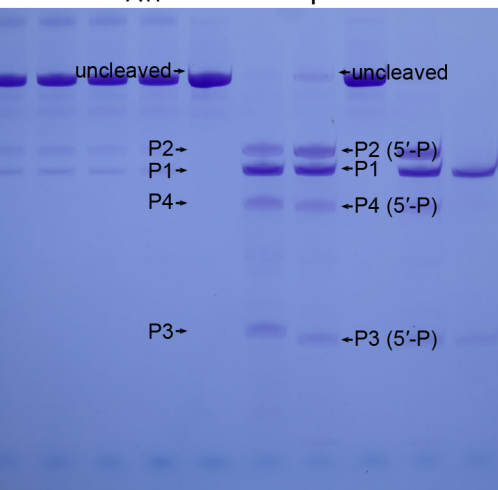

**Figure 1H**

|             |   |   |   |
|-------------|---|---|---|
| ScRat1-Rai1 | - | - | + |
| ITS2        | + | + | + |
| ScLas1-Grc3 | - | + | + |
| ATP         | - | + | + |

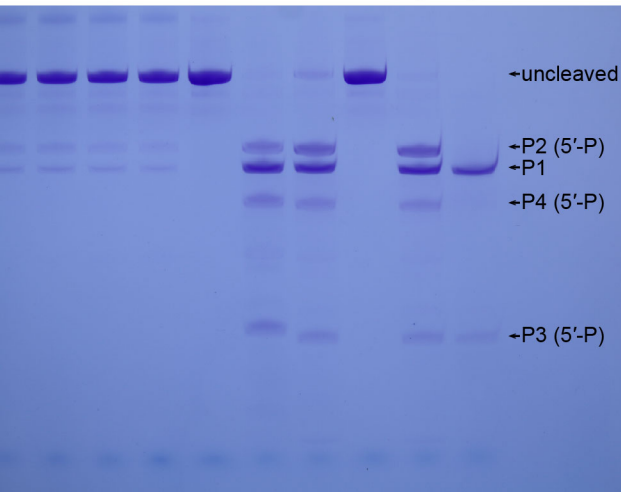

Supplement: fig1-data8 [file elife-86847-fig1-data8-v1.zip]

**Figure 4C**

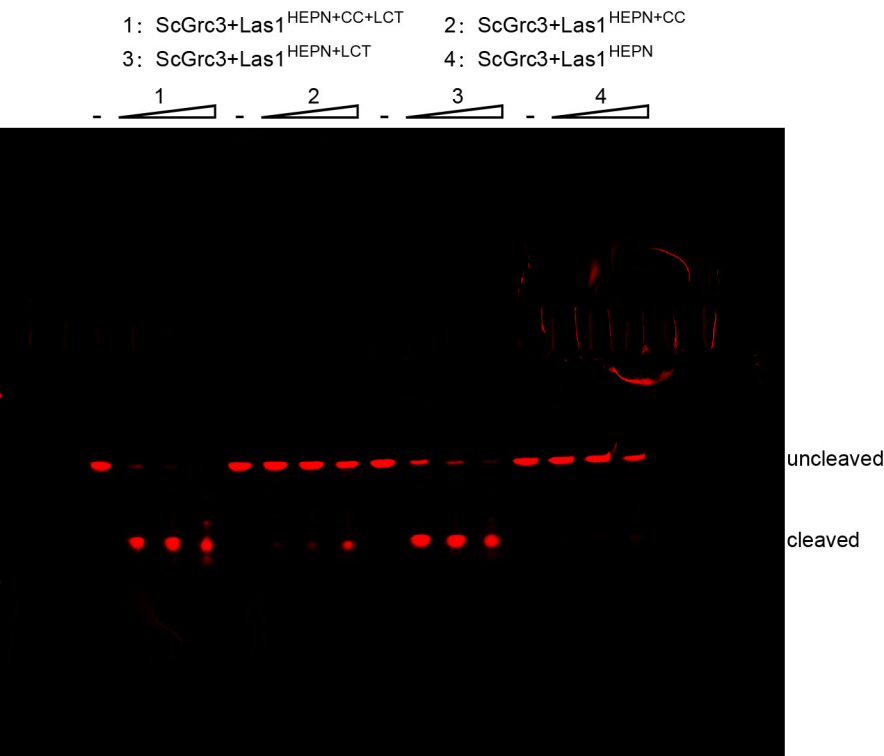

**Figure 4D**

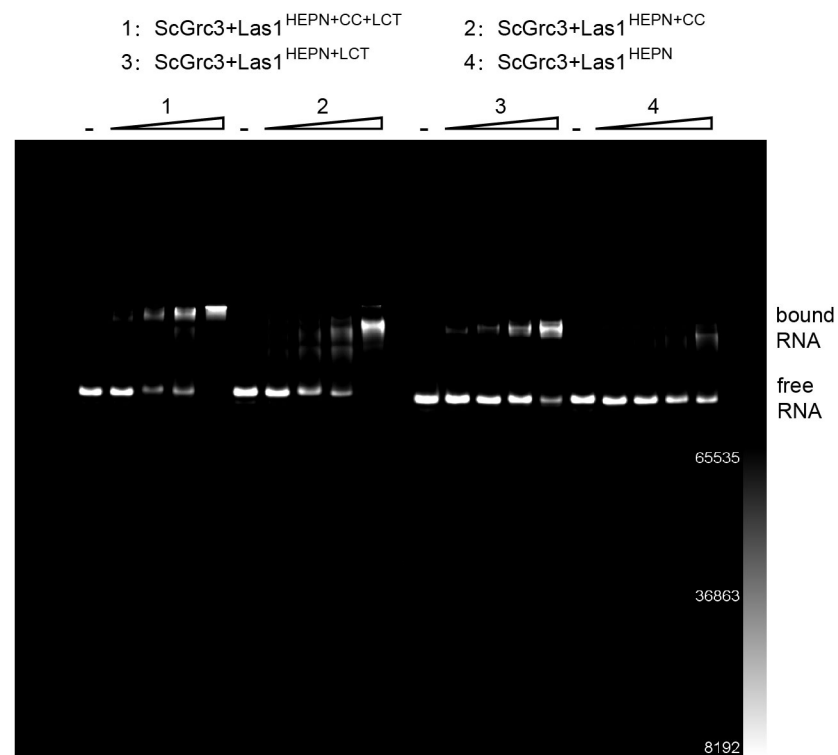

Supplement: fig4-data2 [file elife-86847-fig4-data2-v1.zip]

**Figure 5D**

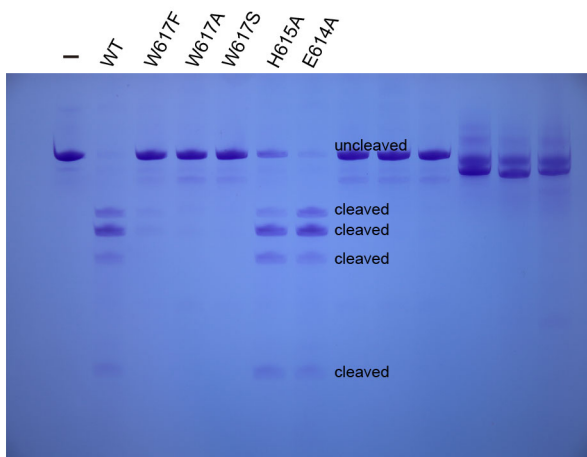

**Figure 5E**

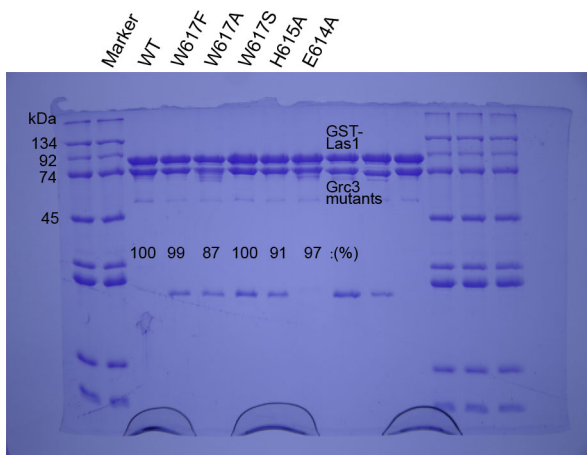

**Figure 5F**

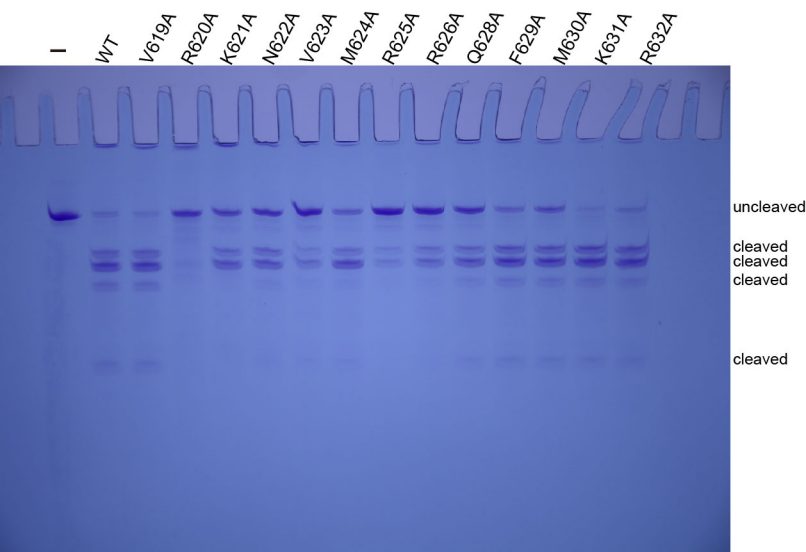

Supplement: fig5-data2 [file elife-86847-fig5-data2-v1.zip]
